# Supplementary material for: L-Asparaginase Conjugates from the Hyperthermophilic Archaea Thermococcus sibiricus with Improved Biocatalytic Properties
Source: MDPI journal article supplement (doi:10.3390/ijms25084174), 2024-04-10
Supplement: s1 [file s1]

# L-asparaginase conjugates from the hyperthermophilic archaea *Thermococcus sibiricus* with improved biocatalytic properties

Natalia V. Dobryakova <sup>1,2</sup>, Maria V. Dumina <sup>1</sup>, Alexander A. Zhgun <sup>1</sup>, Marina V. Pokrovskaya <sup>3</sup>, Svetlana S. Aleksandrova <sup>3</sup>, Dmitry D. Zhdanov <sup>1,3</sup> and Elena V. Kudryashova <sup>1,2,\*</sup>

<sup>1</sup> Group of Fungal Genetic Engineering, Federal Research Center "Fundamentals of Biotechnology of the Russian Academy of Sciences", 117312 Moscow, Russia; natdobryak@gmail.com (N.V.D.); duminamaria@gmail.com (M.V.D.); zzhgun@mail.ru (A.A.Z.)

<sup>2</sup> Chemical Faculty, Lomonosov Moscow State University, Leninskie Gory St. 1, 119991 Moscow, Russia

<sup>3</sup> Laboratory of Medical Biotechnology, Institute of Biomedical Chemistry, 119121 Moscow, Russia, ivan1190@yandex.ru (M.V.P.); v-aleksandrov@yandex.ru (S.S.A.), zhdanovdd@gmail.com (D.D.Z.);

\* Correspondence: helenakoudriachova@yandex.ru

## Content

### 1. Figure S1. SDS-PAGE and native electrophoresis for the TsA enzyme.

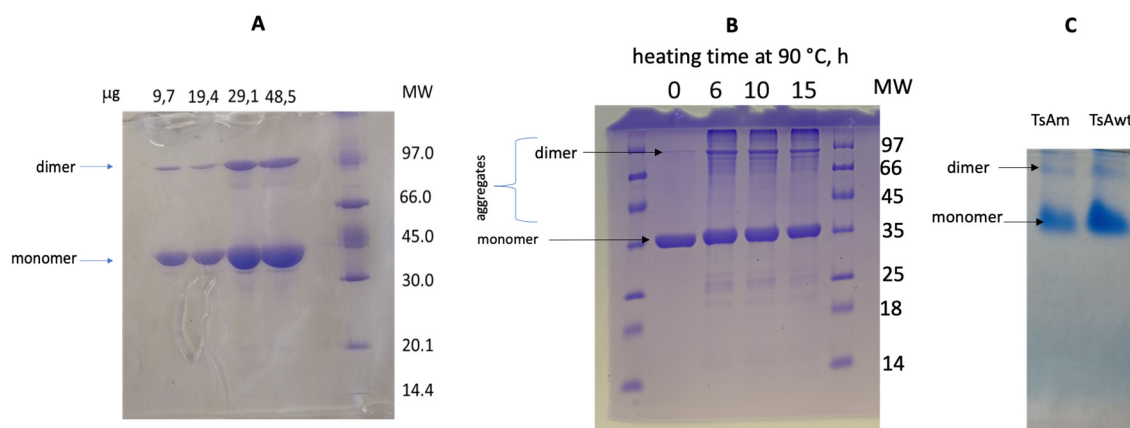

**Figure S1.** SDS-PAGE for the TsA enzyme with oxidised glutathione (A) and heating times at 90 °C (B). Native electrophoresis of wild-type TsA and the mutant (C).

### 2. Figure S2. TIC and UV chromatograms of TsA

**A**

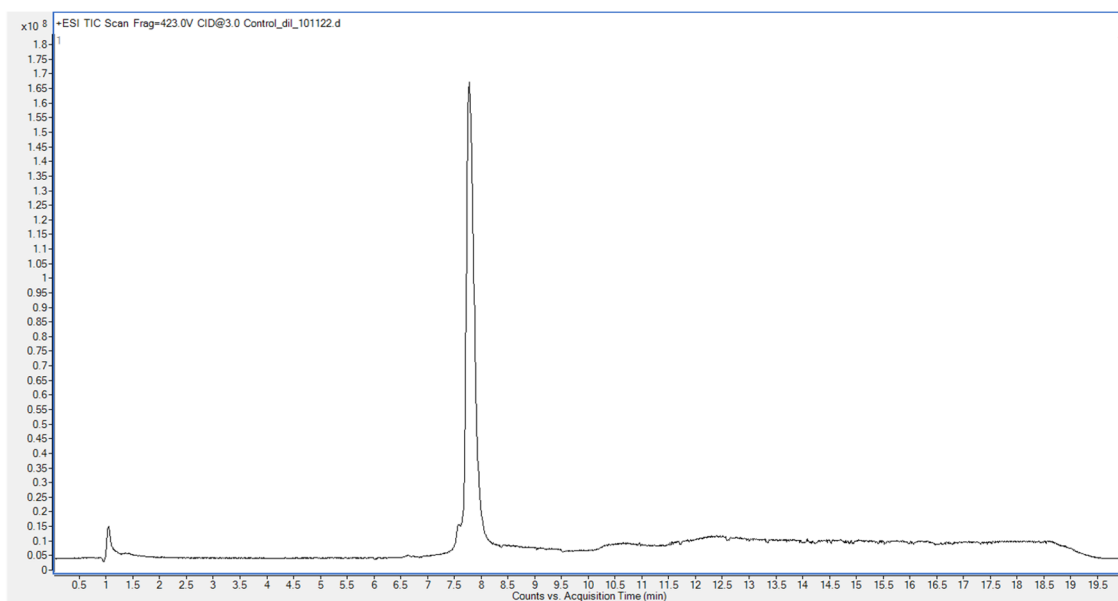

**B**

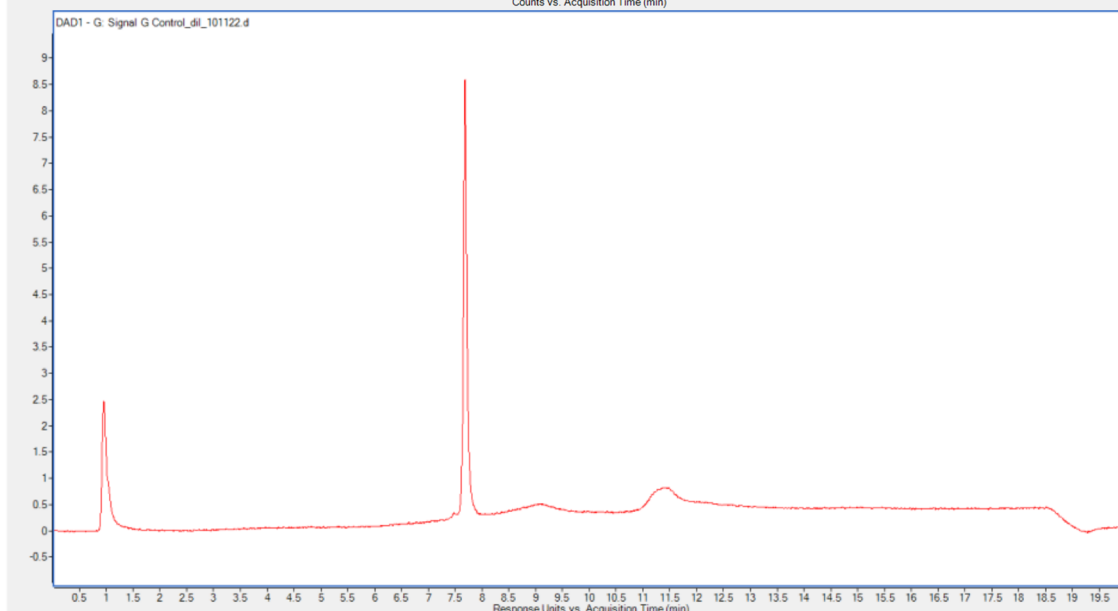

**Figure S2.** (A) Results of total ion current chromatogram (TIC chromatogram), 0.53 µg TsA; (B) UV chromatogram, 0.53 µg TsA, 280 nm.

3. Figure S3. Mass spectra of the TsA.

**A**

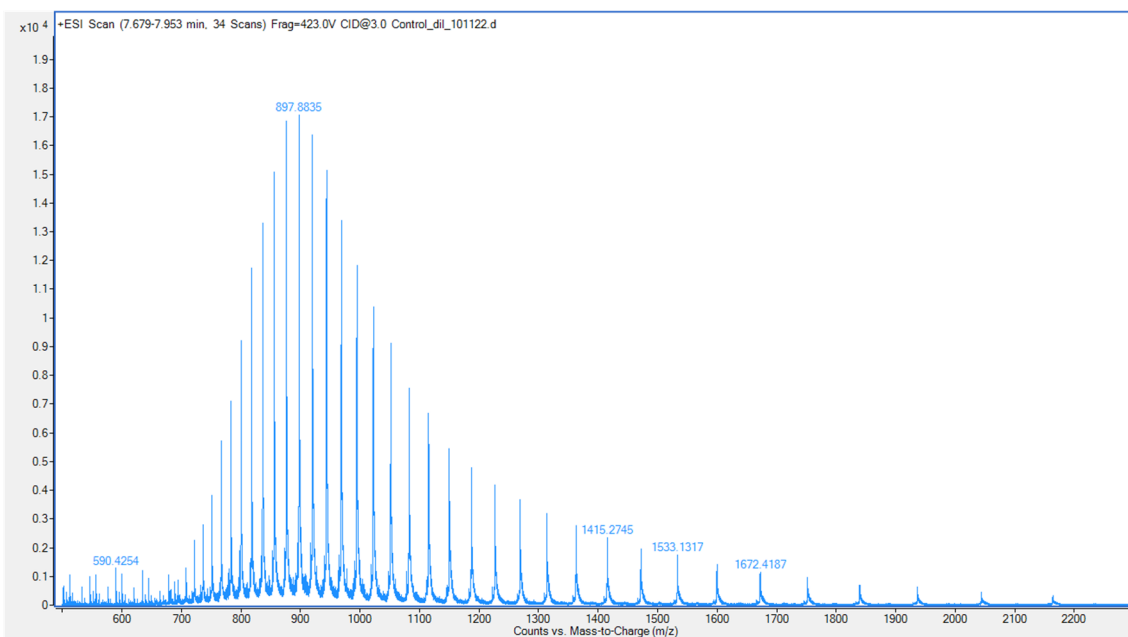

**B**

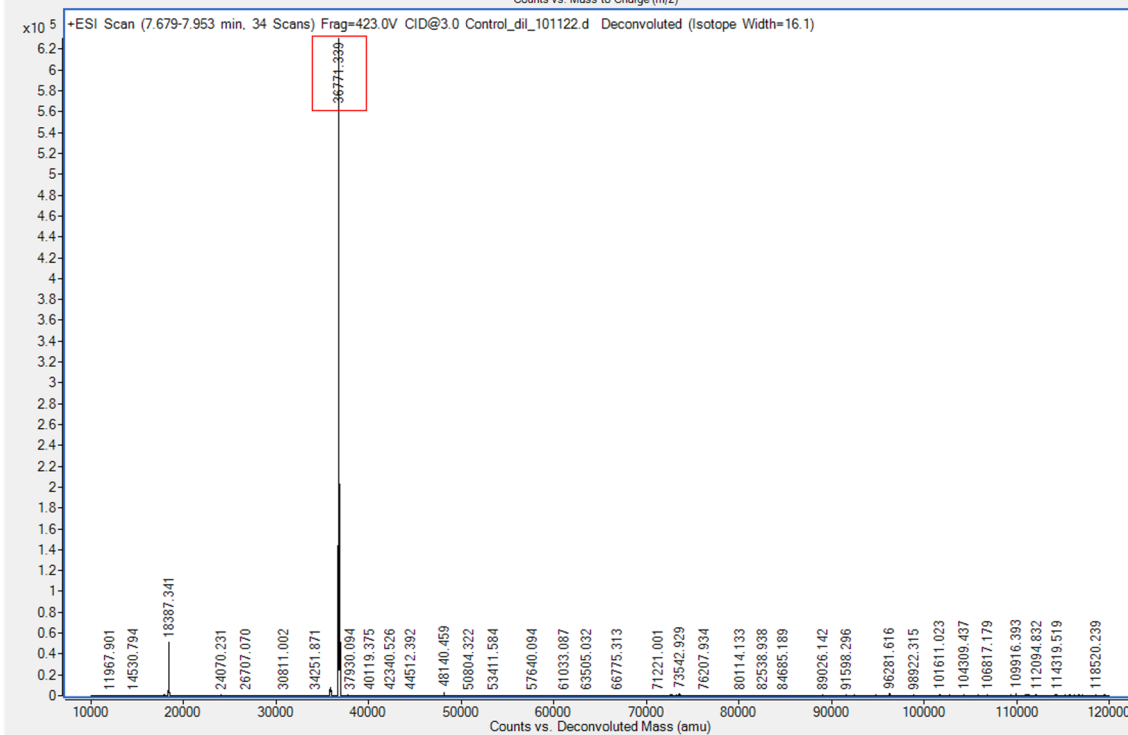

**Figure S3.** (A) Extracted mass spectrum of 0.53  $\mu$ g of TsA over a chromatography interval of 7.6 to 7.9 minutes; (B) Deconvolution of the extracted mass spectrum of 0.53  $\mu$ g of TsA over a chromatography interval of 7.6 to 7.9 minutes.

4. Figure S4. SDS-PAGE for TsA and TsA-PEG.

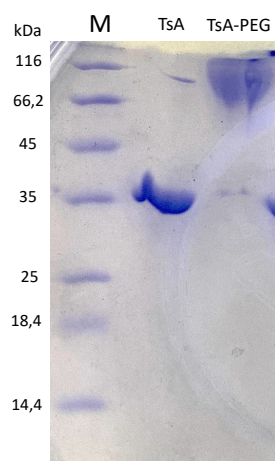

**Figure S4.** SDS-PAGE for TsA and TsA-PEG.
